# Supplementary material
Source: PubMed Central journal article supplement (PMC124971)
Supplement: pnas_152337899_4.pdf [file pnas_152337899_4.pdf]

|        |      |                                                                                                        |
|--------|------|--------------------------------------------------------------------------------------------------------|
| bovine | 1    | -----MKFSKEIEVFNPLASSASSGPIVHVSVFATHSWPKTLFKRDSAVTHRLYGDISRDFQGTSENGVIFQKCAVVSQSEI                     |
| human  | 1    | MIIWPKVECCHFKTAVEAPLG..LD.KM...I.LST.A.....A..L...IP...K.N....E.PI.....EV.....L..GS..A                 |
| mouse  | 1    | -----MGATGPTGAGGRATWVLAGNIIAAL.LVLG...RALPPSFPALPGSPSRPGPAGPWASSQ.S....EAR.PF.....SL..G...S            |
| bovine | 81   | PSAHVRLVFNNTTRPTAANLSDLFLLDNITGLTIREAGNQTSRGFQAFRKKFLQVGDSEFSVSYTASLEARDVGSQDILLPAQXSFQSSSPNRTQLKAP    |
| human  | 101  | QT.RIWL.L...K.TSS...E.L...S.A...WD.V..R..E...S.....A.A...A.T.Q.G.L.N.E.S.K...LT...R.....VL             |
| mouse  | 91   | QTM..Q.S.....SV...N.LV..E...AVK..P..N.QD.I.T...S.....ECY.....DPTAL.T.ES.D...RLI...P.Q.....             |
|        |      | TM                                                                                                     |
| bovine | 181  | FTITREEKITVLPNHGLHARGFCVAFILSLVLTWAVLFFMVRVQCVKGSSLTRHQVQHHEKLEHSQFTSADGVNEDLALNDQMIDILSSEDPGSMQLQAL   |
| human  | 201  | .S.....NV...H.....FT..L.....A..L.....L..NM...R.WQY.S...PLP.....S.....                                  |
| mouse  | 191  | ...V...M.....A..LT..L..V.A...LA..GR.LQ.GM.S.CRI..P.....P.P...N..SQ..S...VVA..T..E.....                 |
|        |      | NLS COIL                                                                                               |
| bovine | 281  | EEELIATLNRAADSDLEACRTQISKDIIALLLKNLTSSGQLSPQVERRMGAVFKKQFLLLEKEIQEEYDARKMVALTAECDLETRKKTESQYQREMAAMEEA |
| human  | 301  | .....A.....H.....K.S.....N.....                                                                        |
| mouse  | 291  | .....Q..A.....N.....M...V.G.H...T..K.A.A.....N.....E...L.....M...N.....V.....                          |
| bovine | 381  | EEVLKRVSEERSAVECCSLLRTLHGLEQEHLLRSLALQQEEDLAKAHRQLAIFQNELHNIFFTQIKSAIFKGELKPEAKMLLQDYSKIQESVEELMDF     |
| human  | 401  | ..L...AG...N.....K.....F.....V.....S.....N.....N.....                                                  |
| mouse  | 391  | .....A.....DMQ...T.D.A..F.Q...V.....S.VY...Q..VS...R..V..M.....T.....                                  |
| bovine | 481  | QASKRYHLSKRFHREYLVQNIQSSETRMQGLLSTASAQLTLLIQKHERAGYLDEDMQVLLERAQTEVFSIKQKLDNDLKQEKKKLHQKLIKRAFEML      |
| human  | 501  | .....L...V.....A...H.....EM.....T.....L.....                                                           |
| mouse  | 491  | ..T.....RL.AM...V...N..AT...S..H.....ET.....T.....R..R..R...L.....                                     |
|        |      | COIL                                                                                                   |
| bovine | 581  | QKHKEQRREQLSIAEASGAEDAGCYLGQWRGLMAEHSAALEELQERLDQAAIDELRALTLSEKATEELRRLQNSGMTQELLKRGVPWFLFQQILEEH      |
| human  | 601  | ...R.....A.VG..FRTV...H.K.S..E.G.T.....D..T.....F...D.....A.....                                       |
| mouse  | 591  | .....QK..V.LG...ST...V...H...SV...T.....D..V..V.....STA.....SA.....                                    |
| bovine | 681  | SRDLAARAERLEGEERDRGQEGVQSVRQRLKDDALEASTEEQAEALRHWEHLIFTKLCSSAFSLSEEELLGMRQEVHGCFAQMDRSLALPKIARAVLLQRF  |
| human  | 701  | GKEM...Q...D...P..V.....R.....M...V.....R.....Q..                                                      |
| mouse  | 691  | ..ES...TTQ..A...E...L..G...QQ...Y.....V.M...CA.I...D..RV...AQ...S.L.....RV...Q.QA                      |
|        |      | NLS                                                                                                    |
| bovine | 781  | QTAWREAREFLKLDQAMTAPELCPQSKARKPKSKRSKIDLLKKCTEDKIQLFKEQAPEDLVEKVRGELLRERVXQLEAQEGLFRESLVSLQFQKARMAR    |
| human  | 801  | .....V...VA...Q...V..S...K..GE...I...H.CE...S.....QRM...G..Q...A.....S.VTE                             |
| mouse  | 791  | .M.....R.....LA...--.....L..G.G.A...NL...R..E.R..VE.ADQ.....Q..QR.....AH.....A...V..A.E                |
|        |      | COIL                                                                                                   |
| bovine | 881  | TLWAYTALLSIQDLLLEELNSSETLTKSACMQILESHPELQEL---ERKLEDQLAHQEAQLQALDQWQQWAGEGPALLQEPEETDSERHVSAVLQRA      |
| human  | 901  | ..S.....SA..M.....T.....R.....VQ.....Q.Q..A...VAD..GI.N..G.V...Q..T..HQ..                              |
| mouse  | 889  | ..SV.....G..SE.....V...R.....QEL.....VQ..E.EQ..V.E...R..AD..G-..S...M.P..Q...I..RQ..                   |
| bovine | 978  | LSKGQKLLLEYHQQSLREEQEDSVVLEDLLENMETDTFVTLVYQELRLASVLSKLTMLPGGTLRALLTVALPARSQAEALLAVLDSVGGKHQDHSVENDGSR |
| human  | 998  | ...S.T...Q...C...QN.....A...A..CS.....ARMA.V..A...S.V..T...PQ...L...ATER.V..AA.S..GA                   |
| mouse  | 988  | .N.....Q...RV...WQNGA...S..SI..A..MAS.CS.G...V...RM..V..S..L...S.V.....PQ...L..A.SE..S..TA..ES.G       |
|        |      | NLS NLS                                                                                                |
| bovine | 1078 | VQA--DLGRRGKHQGWQALESKLRGELINRGLEKMLWAQKRKESILKKTCPPLRERVIFSGKRSPHLSLESTDELTPVPIVGAERVDLLNTGEKLFIF     |
| human  | 1098 | E...V...R...S.....DG...D..S.....R...Q.....L.....M.....G.....PIG..A.....TI.....                         |
| mouse  | 1088 | E...QAEQSK.R...V..KV.D.RF.AD.VSQ...R.....RQK..R...IYV.VQ...M.P..G.....PIG..A..I..T..D.M.I.....I.V.     |
|        |      | NLS                                                                                                    |
| bovine | 1176 | BNPKEPEISLHVPPAKKKKIFLNAKKAAWALGLN                                                                     |
| human  | 1196 | .....R.....MR...MD                                                                                     |
| mouse  | 1188 | .S.R.....R...R...NR...D                                                                                |
